# Supplementary material
Source: PubMed Central journal article supplement (PMC6589821)

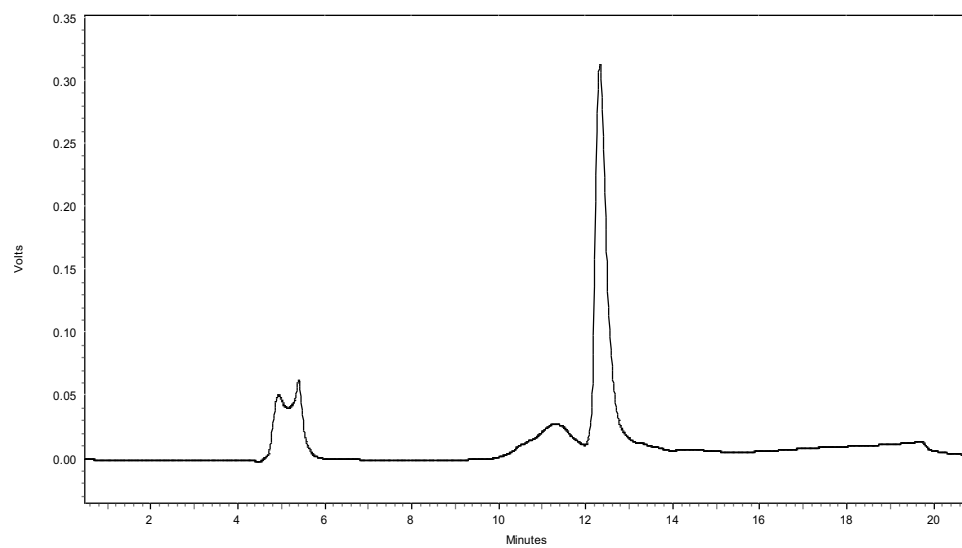

(Note: peaks at a retention time of 4.5 – 5.5 minutes are a column artifact)

**Compound 4,  $^1\text{H}$  NMR (500 MHz,  $\text{CD}_3\text{OD}$ ):**

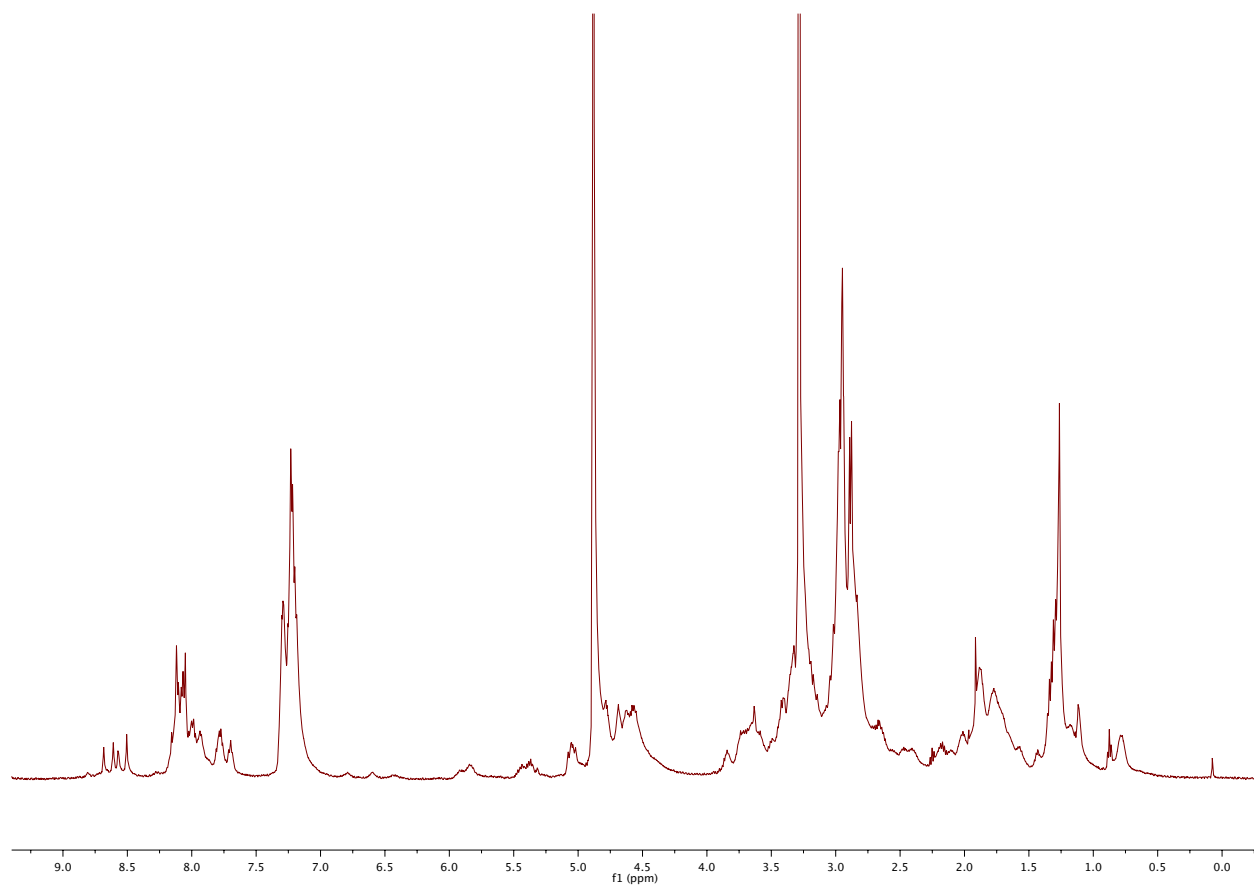

Compound 4,  $^{13}\text{C}$  NMR (125 MHz,  $\text{CD}_3\text{OD}$ ):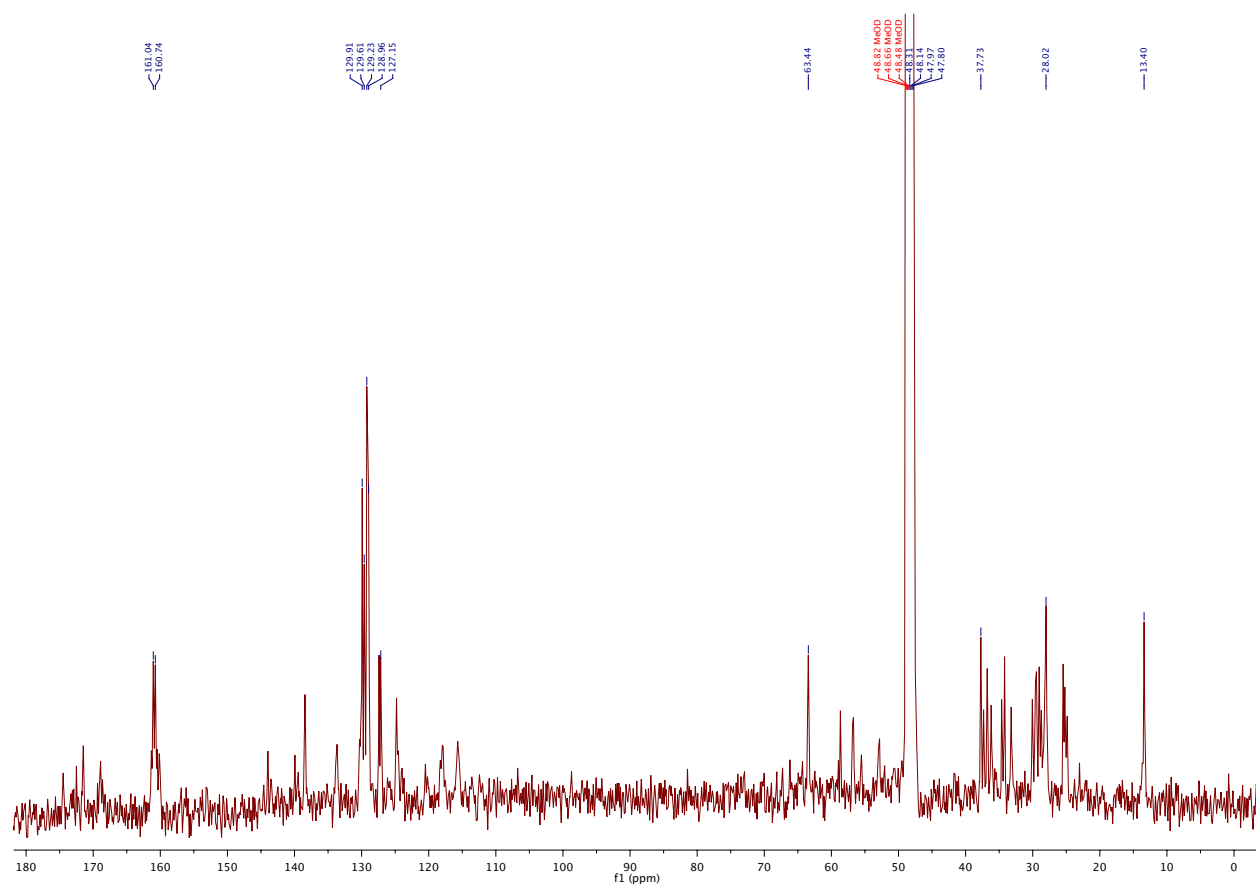

**Compound 5.**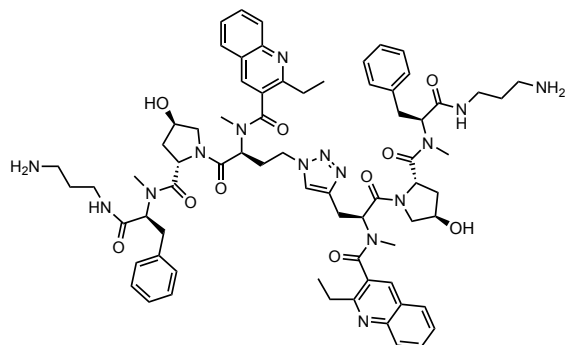**C<sub>71</sub>H<sub>89</sub>N<sub>15</sub>O<sub>10</sub>**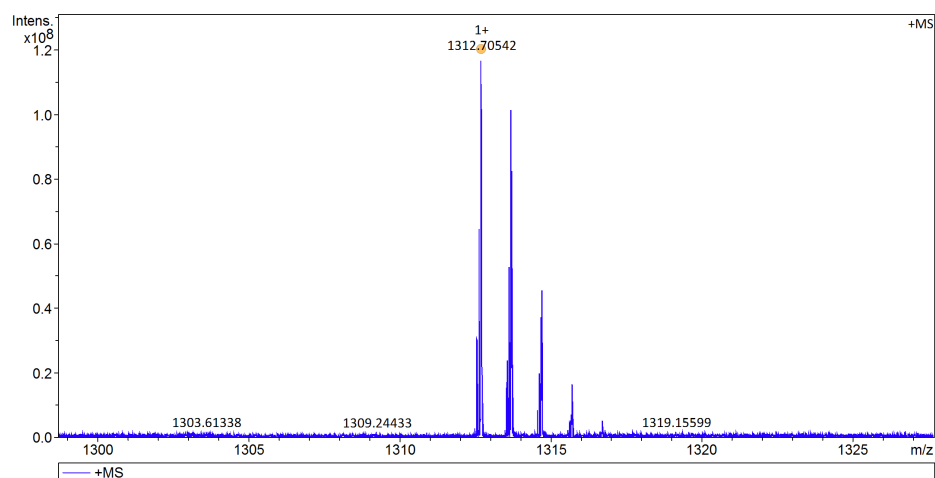

HRMS (M+H)<sup>1+</sup> Calculated: 1312.69896; measured: 1312.70542

**Compound 5, Analytical HPLC (254 nm):**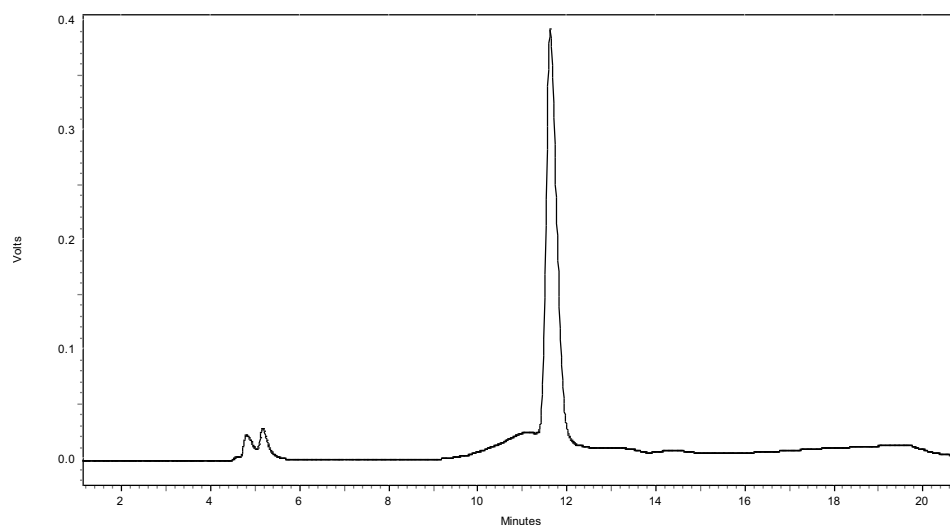

**Compound 5,  $^1\text{H}$  NMR (400 MHz,  $\text{CD}_3\text{OD}$ ):**

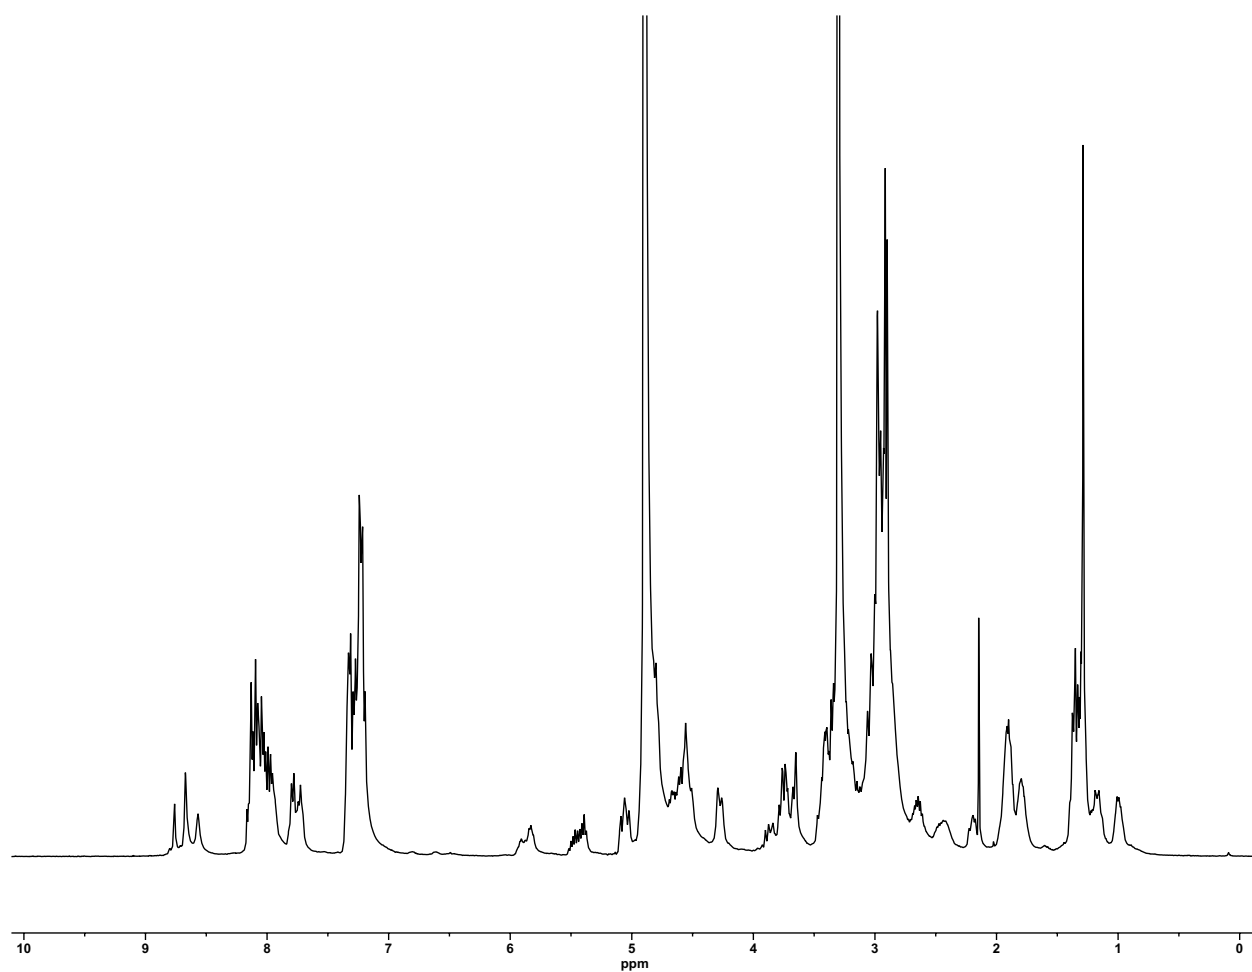



**Compound 6.**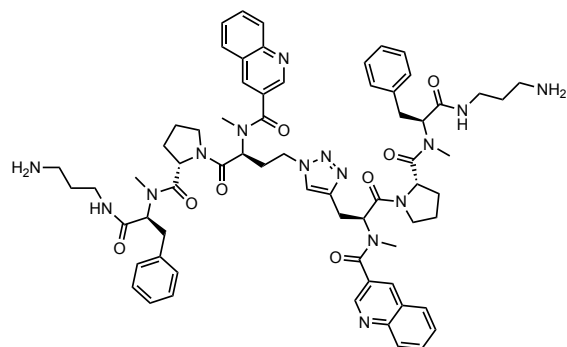**C<sub>67</sub>H<sub>81</sub>N<sub>15</sub>O<sub>8</sub>**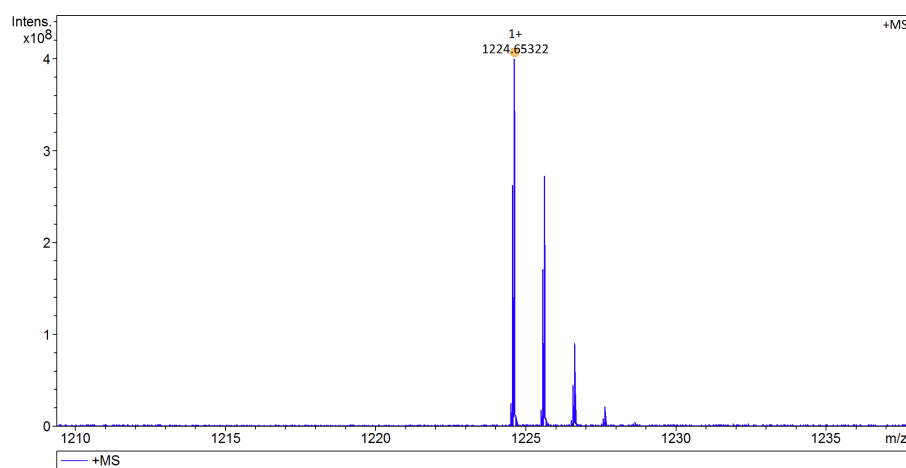HRMS (M+H)<sup>1+</sup> Calculated: 1224.64653; measured: 1224.65332**Compound 6, analytical HPLC (254 nm):**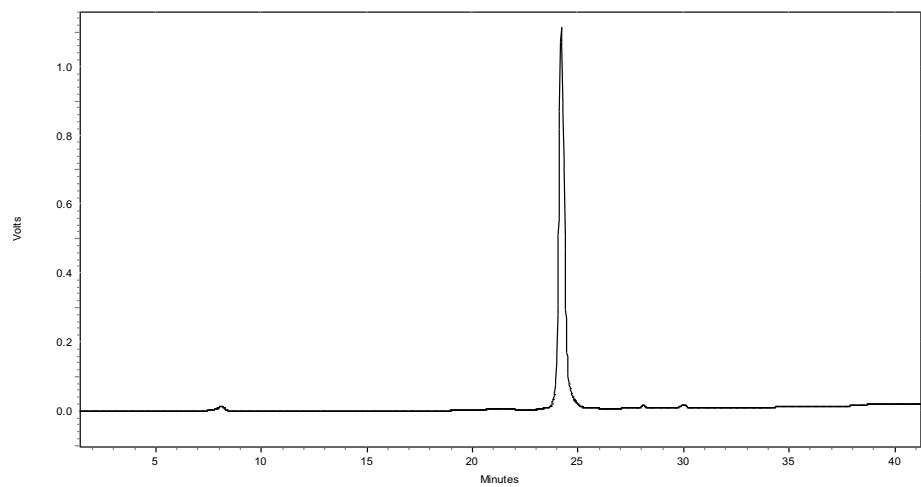



**Compound 6,  $^1\text{H}$  NMR (500 MHz,  $\text{CD}_3\text{OD}$ ):**

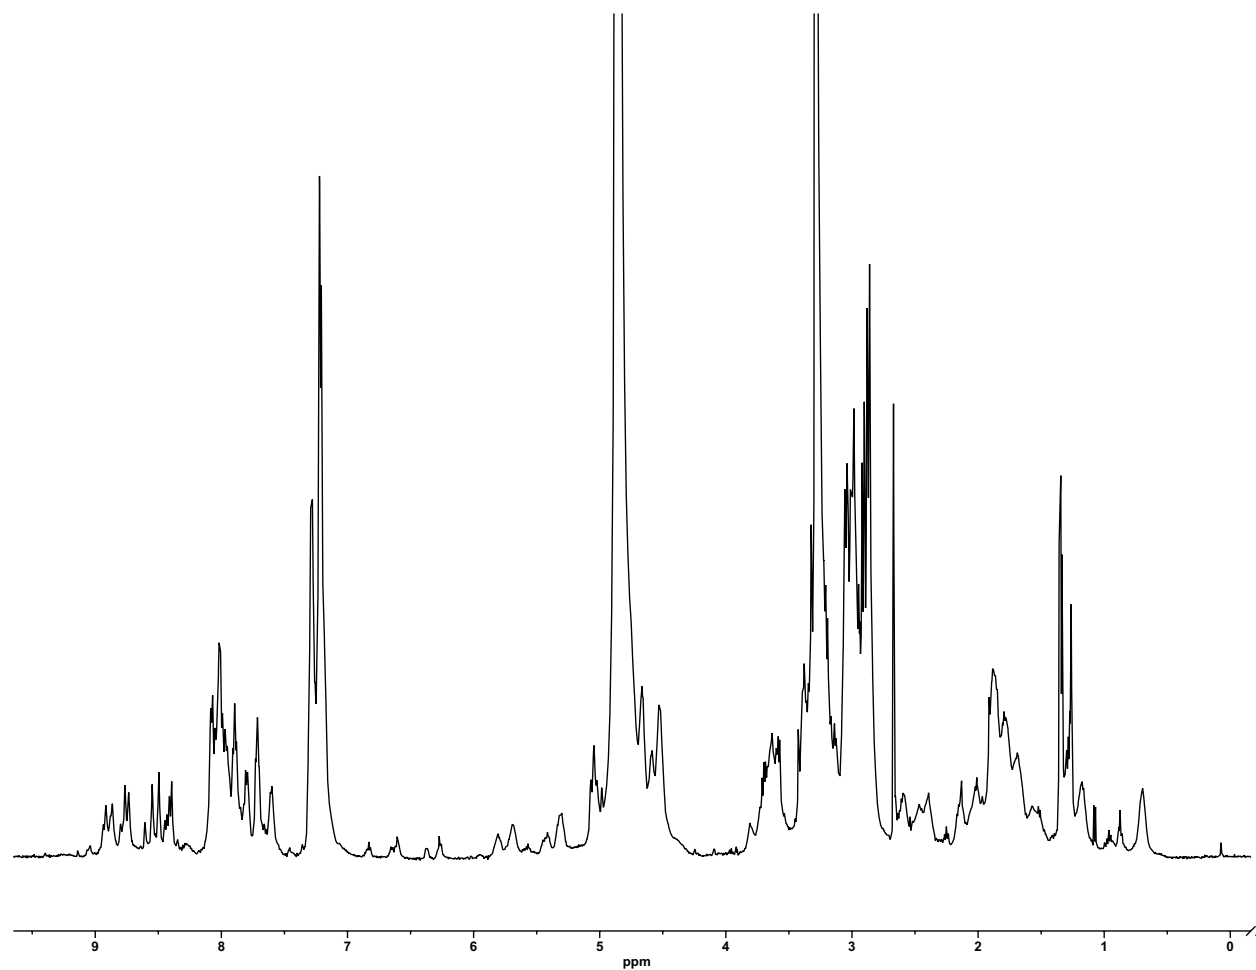

**Compound 6,  $^{13}\text{C}$  NMR (125 MHz,  $\text{CD}_3\text{OD}$ ):**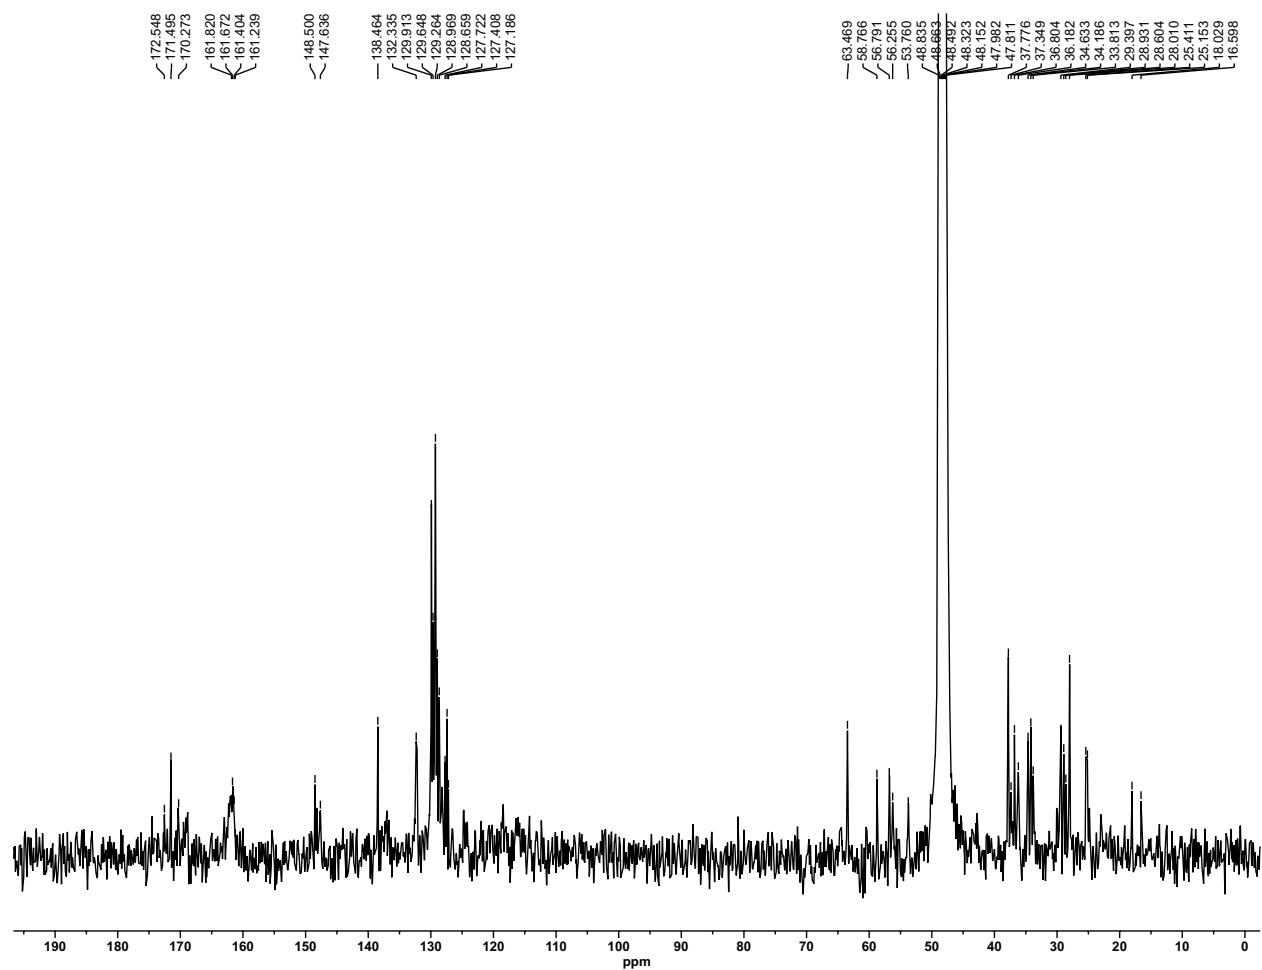

**Compound 7.**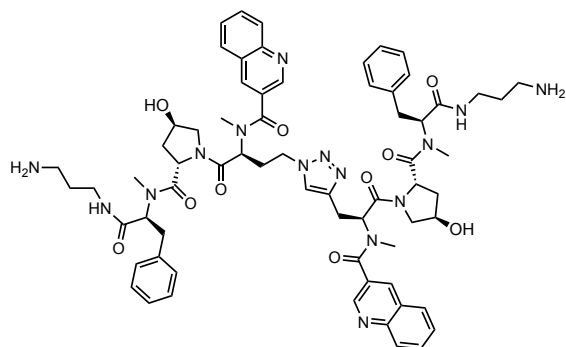**C<sub>67</sub>H<sub>81</sub>N<sub>15</sub>O<sub>10</sub>**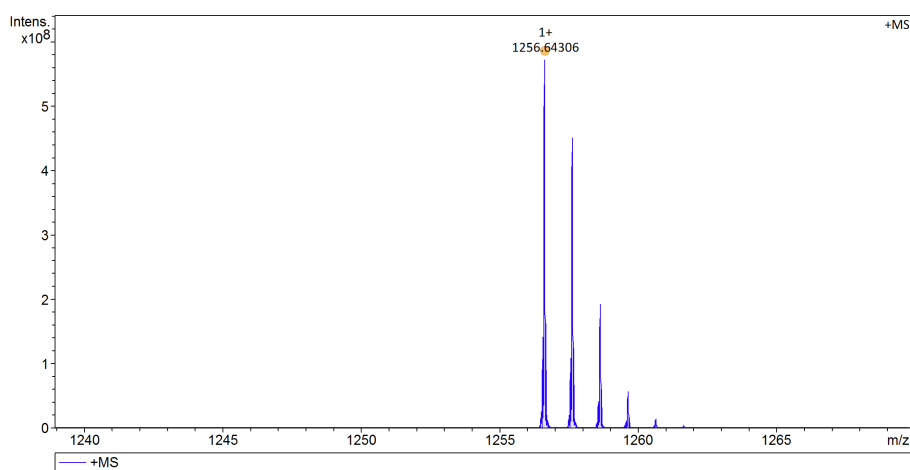

HRMS (M+H)<sup>1+</sup> Calculated: 1256.63636; measured: 1256.64306

**Compound 7, analytical HPLC (254 nm):**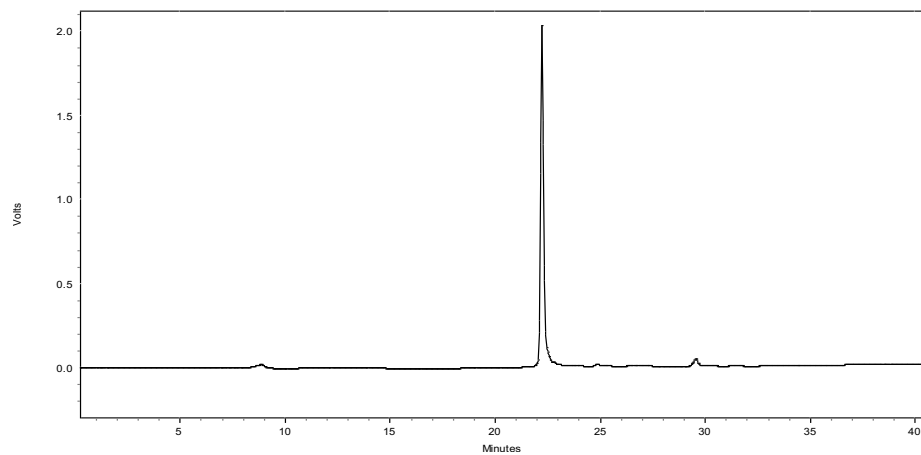

**Compound 7,  $^1\text{H}$  NMR (500 MHz,  $\text{CD}_3\text{OD}$ ):**

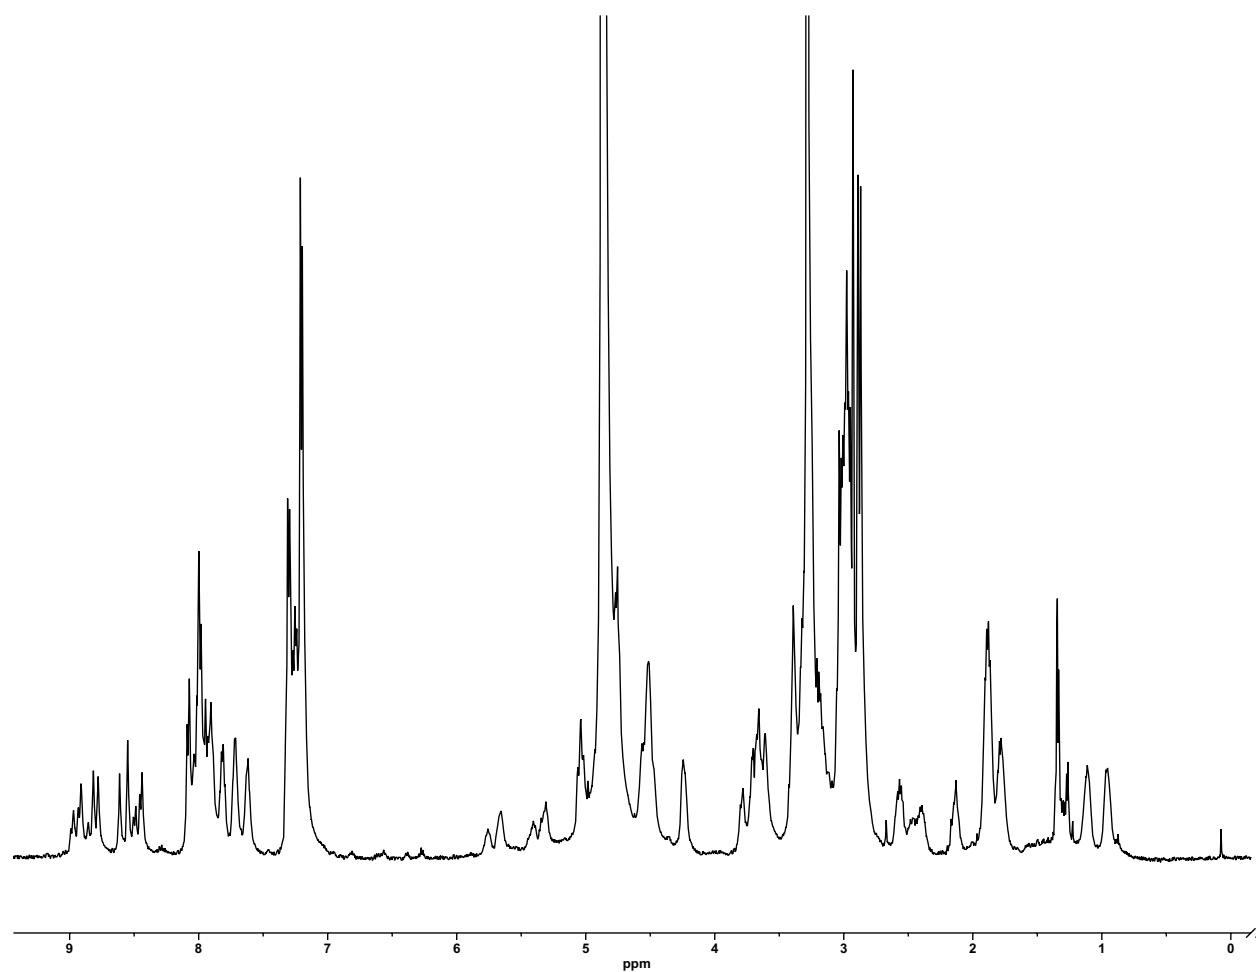

Compound 7,  $^{13}\text{C}$  NMR (100 MHz,  $\text{CD}_3\text{OD}$ ):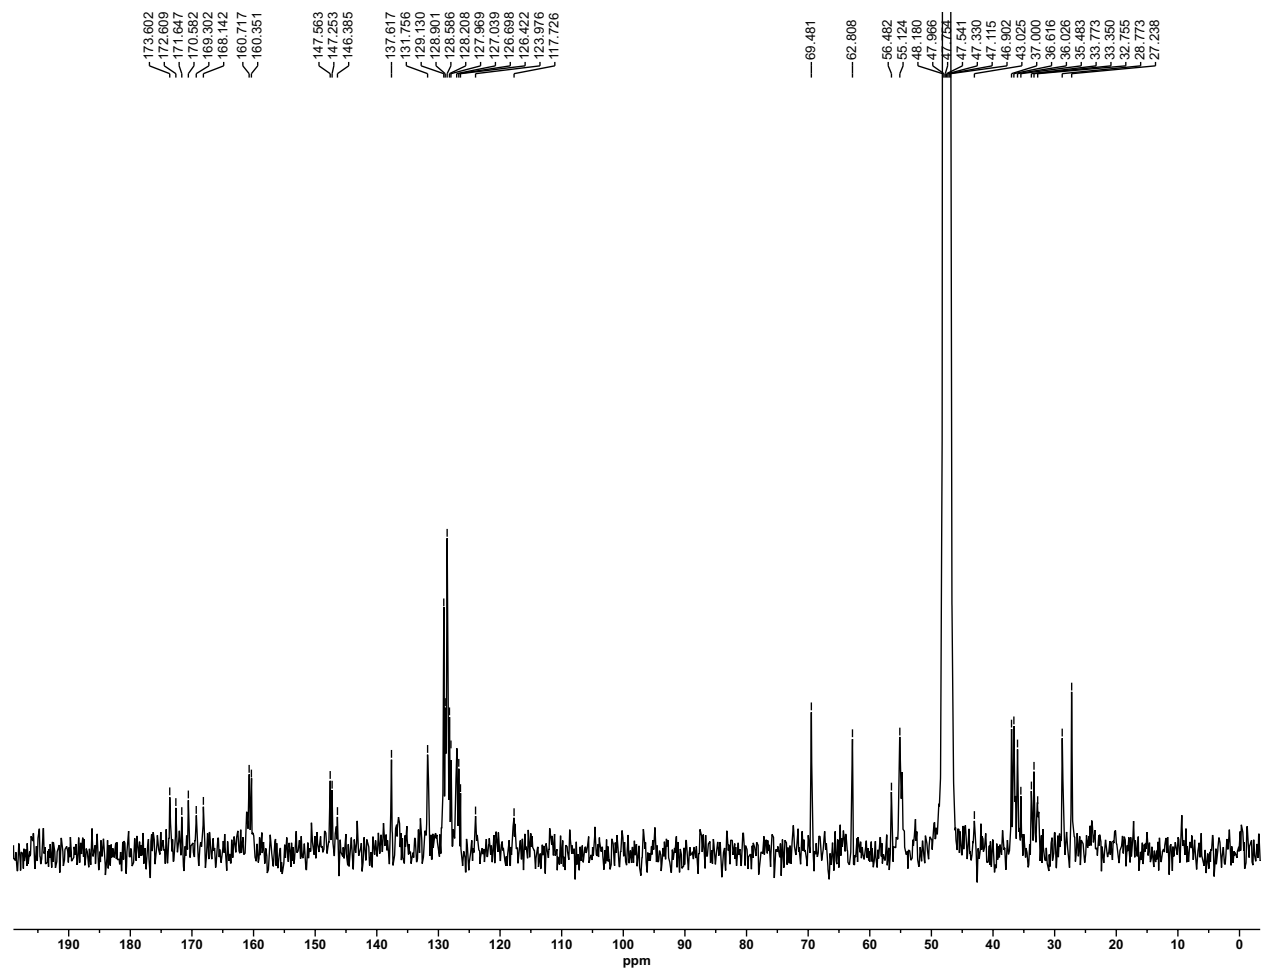

2. RNA sequences used in competition dialysis. All secondary structures were predicted using RNAstructure; <https://rna.urmc.rochester.edu/RNAstructure.html>. All synthetic RNAs exhibited concentration-independent melting behavior consistent with unimolecular transitions.

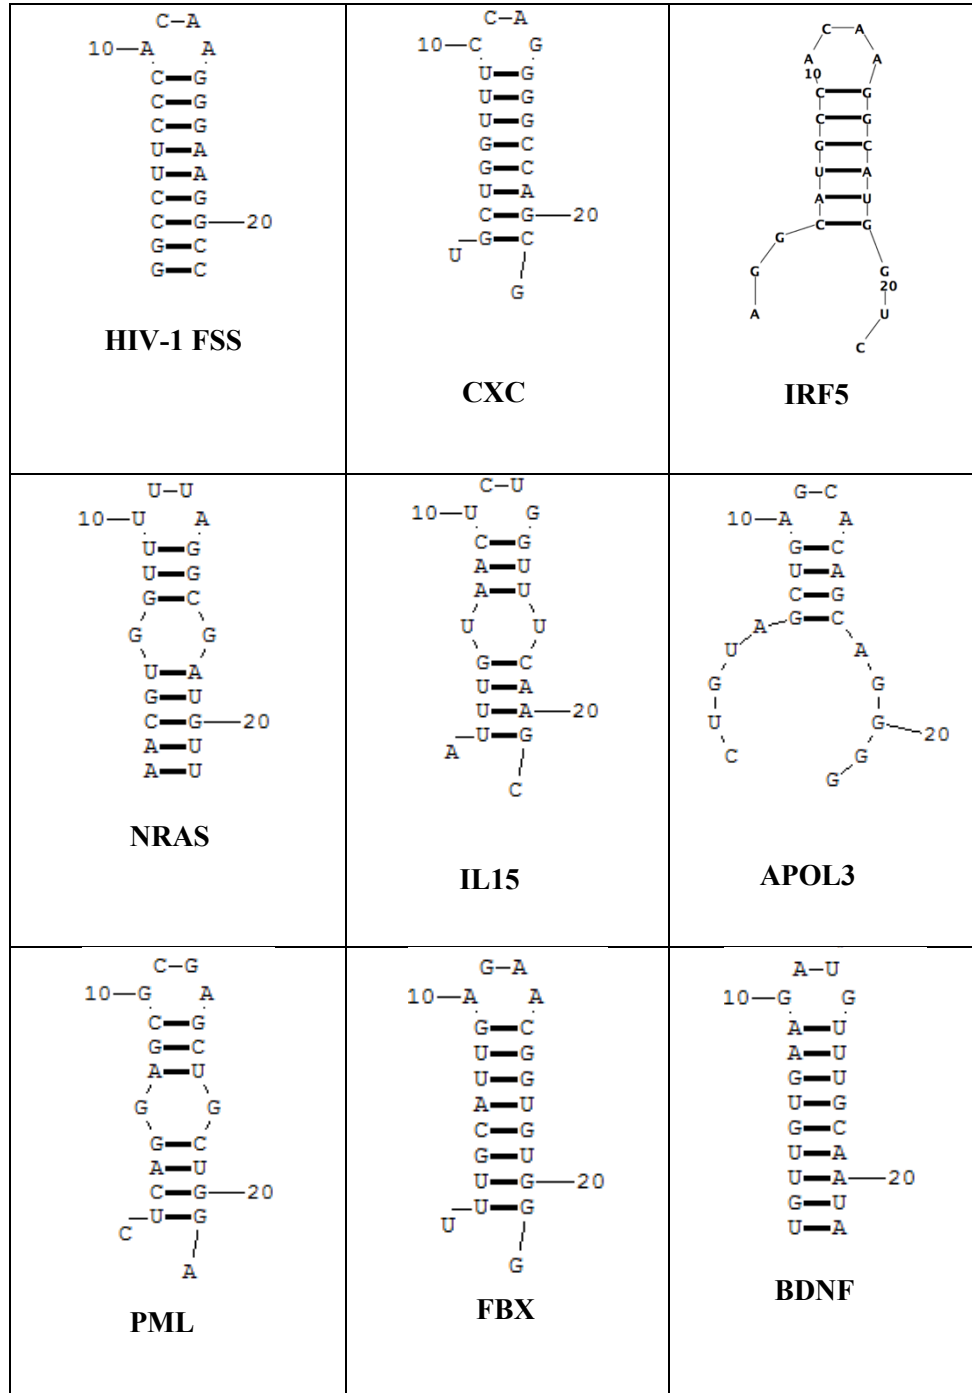

Supplement: NIHMS1529707-supplement-1.pdf [file NIHMS1529707-supplement-1.pdf]
